# Supplementary material for: Ad26.COV2.S prevents upregulation of SARS-CoV-2 induced pathways of inflammation and thrombosis in hamsters and rhesus macaques
Source: PLoS Pathog. 2022 Apr 8;18(4):e1009990. doi: 10.1371/journal.ppat.1009990 (PMC9020736; doi:10.1371/journal.ppat.1009990)
Supplement: S1 Table — (XLSX) [file ppat.1009990.s011.xlsx]

## Sheet: Table S1
Group	Dose	Animal ID	gene-5pUTR	gene-E	gene-M	gene-N	gene-orf10	gene-orf1ab	gene-orf3a	gene-orf6	gene-orf7ab	gene-orf8	gene-S	Log10 viral load in the Lung (day 4)	Log10 viral load in Nares (day 4)
Ad26.dTM.PP	10x10	X234	75.9815	533.835	3052.36	30137.1	2628.57	83200.4	1839.93	2914.81	1311.99	1277.27	13988.5	8.44	7.78
Ad26.dTM.PP	10x10	X238	7.42575	50.6301	317.282	2745.5	243.025	8844.75	199.145	347.66	137.714	112.061	1400.77	8.1	7.88
Ad26.dTM.PP	10x9	X244	14.2135	127.353	910.229	7918.6	762.409	14944	396.271	930.697	368.413	393.428	2736.94	7.8	5.84
Ad26.dTM.PP	10x9	X248	7.13892	98.755	651.426	5928.87	481.282	17638.5	380.742	641.908	266.52	262.95	2806.19	8.1	7.22
Ad26.S.PP	10x10	X261	0	0	0.616059	2.46423	0	12.9372	0	0	0	0	1.23212	6.17	6.94
Ad26.S.PP	10x10	X262	0	0.557842	0.557842	2.23137	1.11568	8.92547	0	0.557842	0	0	1.67353	5.94	2.7
Ad26.S.PP	10x9	X267	0	1.06908	1.06908	23.5197	0	62.5409	2.67269	2.13815	0.534538	0	9.62168	6.42	5.49
Ad26.S.PP	10x9	X271	0	0	0	4.1603	0.594329	4.75463	0	0	0	0	2.37731	5.69	5.29
Ad26.S.PP	10x9	X272	0	0.692438	11.079	110.098	9.69413	267.973	6.92438	11.079	9.69413	4.15463	35.3143	7	5.73
SHAM	SHAM	X277	320.846	2247.21	15755.6	137822	11854.5	356134	8436.7	15309.8	6569.61	6217.84	64823.7	11.73	10.22
SHAM	SHAM	X281	338.686	1899.08	13528.4	120895	10533.2	314992	7136.15	12724.1	5787.52	5366.03	54232.4	11.72	10.07
SHAM	SHAM	X282	120.702	892.681	5512.29	46238	4138.09	155984	2942.68	5591.03	2176.51	2176.51	24530.3	11.5	10.16
